# Supplementary material for: Targetable, two-photon fluorescent probes for local nitric oxide capture in the plasma membranes of live cells and brain tissues
Source: Royal Society of Chemistry journal article supplement (doi:10.1039/c8an00905h), 2018-01-01

## Supporting Information

### Targetable, Two-Photon Fluorescent Probe for Local Nitric Oxide

### Capture in the Plasma Membranes of Live Cells and Brain Tissue

Xinfu Zhang,<sup>†</sup> Benlei Wang,<sup>†</sup> Yi Xiao,<sup>†\*</sup> Chao Wang,<sup>†</sup> and Ling He<sup>†</sup>

\*Corresponding author, E-mail address: xiaoyi@dlut.edu.cn

<sup>†</sup>State Key Laboratory of Fine Chemicals, Dalian University of Technology, Dalian 116024, China

## Table of Contents

|                       |         |
|-----------------------|---------|
| Figure S1-Figure S9   | S2-S5   |
| NMR spectra           | S6-S112 |
| HRMS of <b>Mem-NO</b> | S12     |

# **Single Mass Analysis**

Tolerance = 5.0 PPM / DBE: min = -1.5, max = 50.0

Element prediction: Off

Number of isotope peaks used for i-FIT = 3

Monoisotopic Mass, Even Electron Ions

8 formula(e) evaluated with 1 results within limits (up to 50 closest results for each mass)

Elements Used:

C: 0-80 H: 0-100 N: 6-6 O: 2-2

ZHXF

15072409 73 (0.720) AM (Cen,2, 80.00, Ht,5000.0,0.00,1.00); Sm (Mn, 2x3.00); Cm (69:88)

1: TOF MS ES+  
5.36e+002

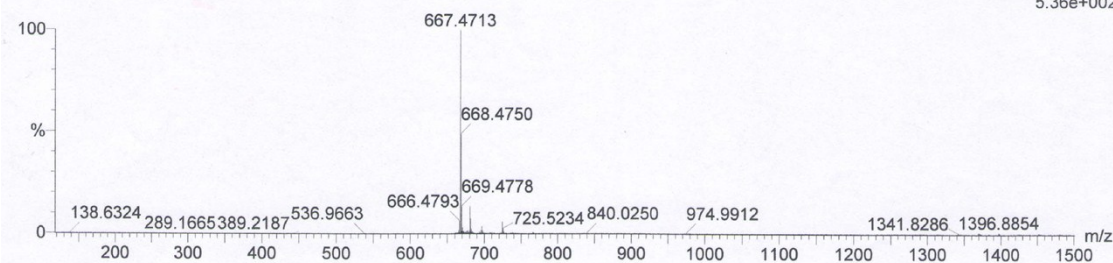

Minimum:

Maximum:

5.0

5.0

-1.5

50.0

Mass

Calc. Mass

mDa

PPM

DBE

i-FIT

Formula

667.4713

667.4700

1.3

1.9

15.5

0.4

C41 H59 N6 O2

**Figure S1.** HRMS of Mem-NOT, prepared from Mem-NO by adding NO solution.

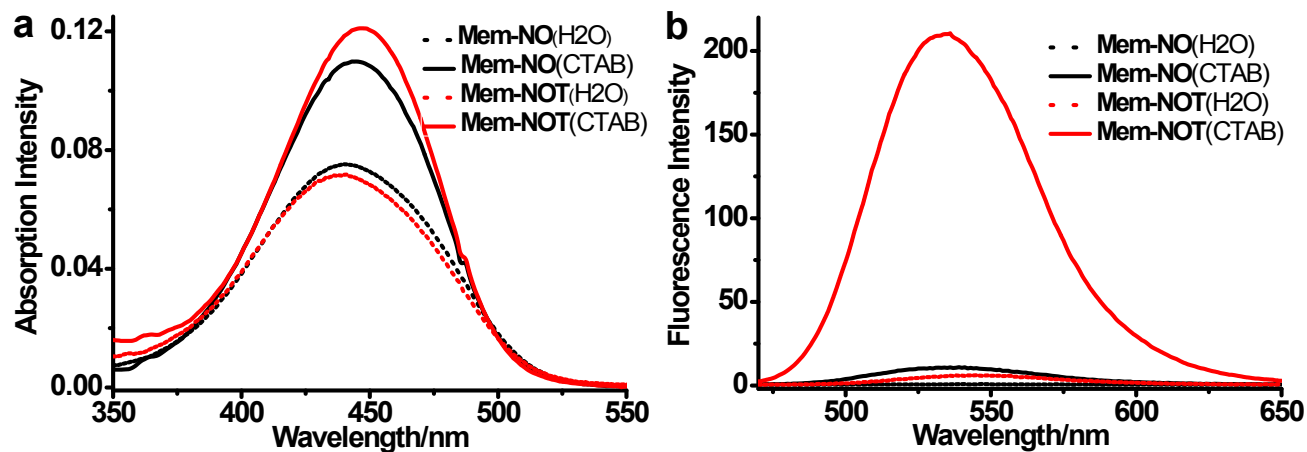

**Figure S2.** (a) Absorption spectra and (b) fluorescence spectra of Mem-NO ( $5 \times 10^{-5}$  M) and Mem-NOT ( $5 \times 10^{-5}$  M) in water and 2 mM CTAB solution.

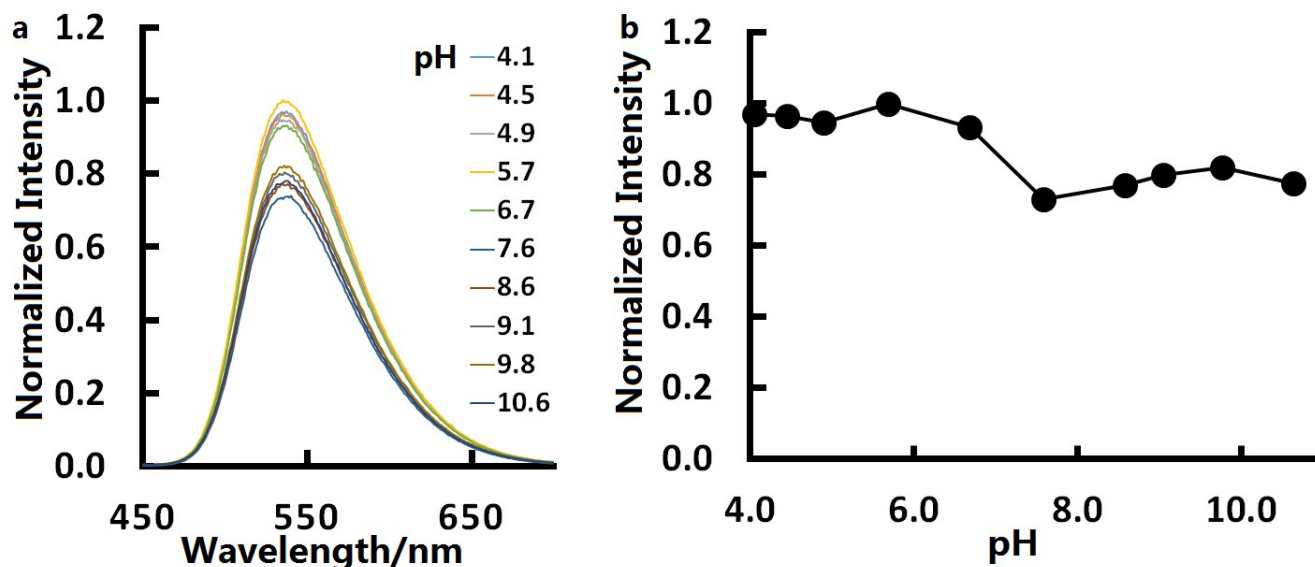

**Figure S3:** (a) Normalized fluorescence spectrum of **Mem-NO** vs pH; (b) normalized fluorescence intensity at 535 nm vs pH.

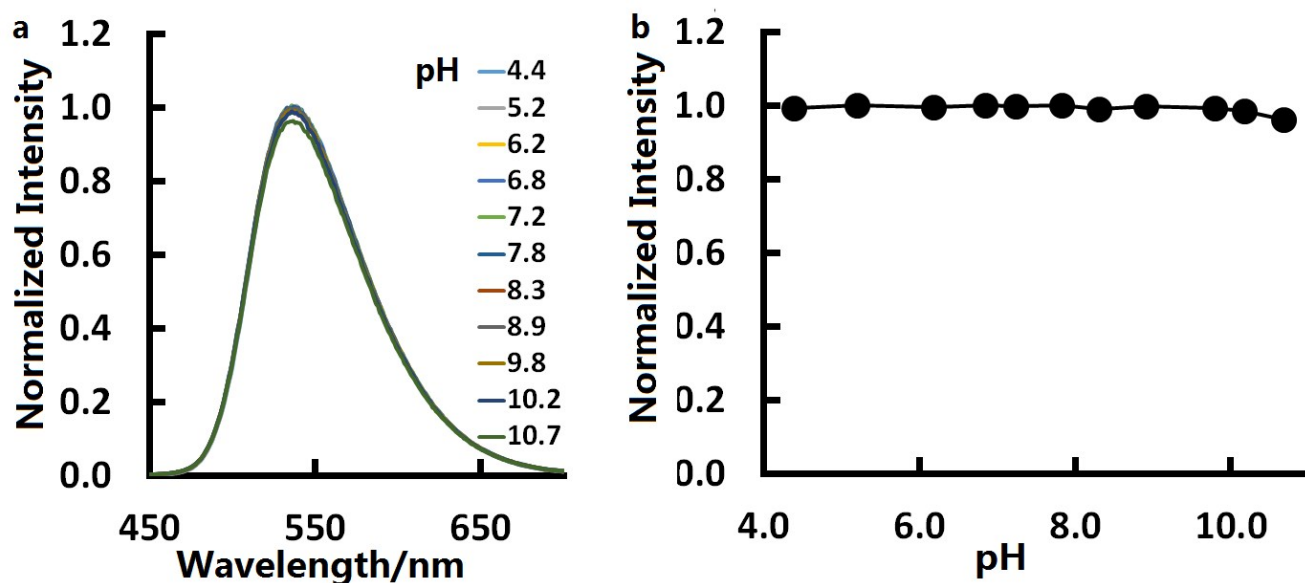

**Figure S4:** (a) Normalized fluorescence spectrum of **Mem-NOT** vs pH; (b) normalized fluorescence intensity at 535 nm vs pH.

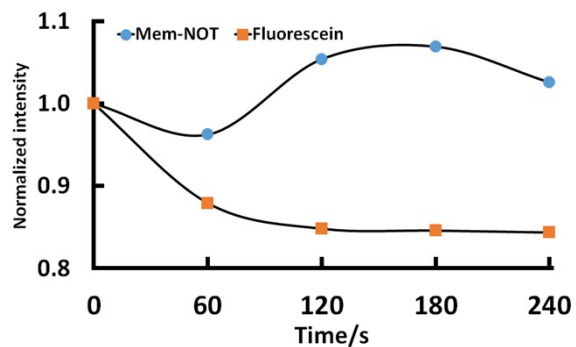

**Figure S5.** Normalized remaining fluorescence intensity upon various irradiation time.

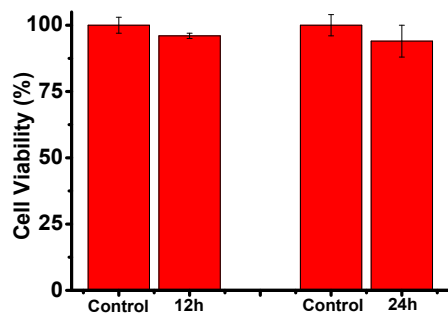

**Figure S6.** Cell viability of **Mem-NO** (5.0  $\mu$ M) after incubated for 12 h and 24 h.

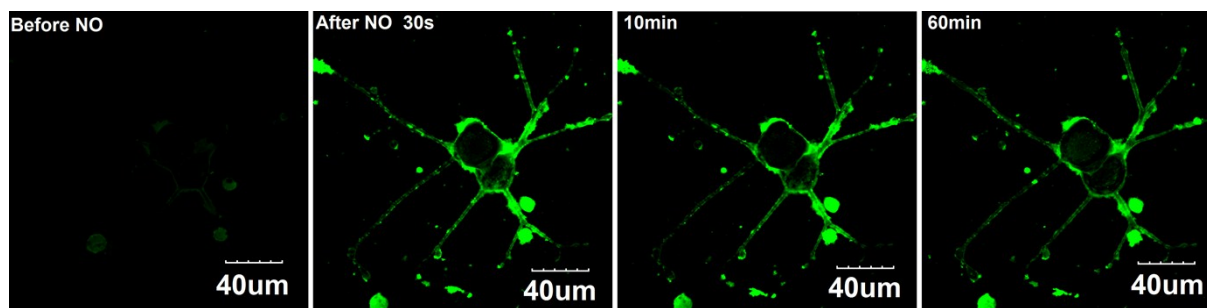

**Figure S7.** Fluorescence images of neuron cells stained with **Mem-NO** (5  $\mu$ M, 5 min) before and after adding NO solution.

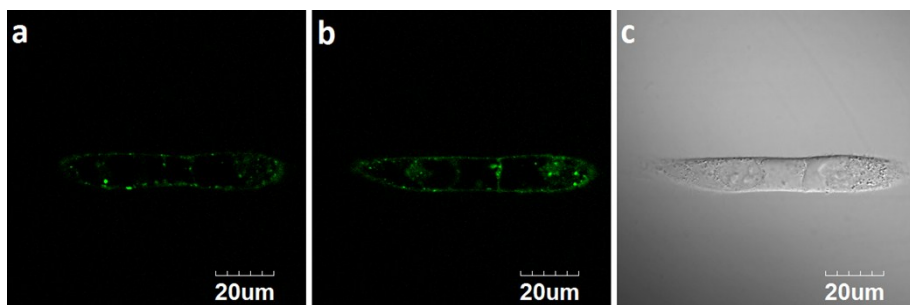

**Figure S8.** Fluorescence images of HUVEC cells stained with **Mem-NO** further incubated in normal culture medium. (a) is 0 min, (b) is 30 min after the incubation, (c) is bright field.

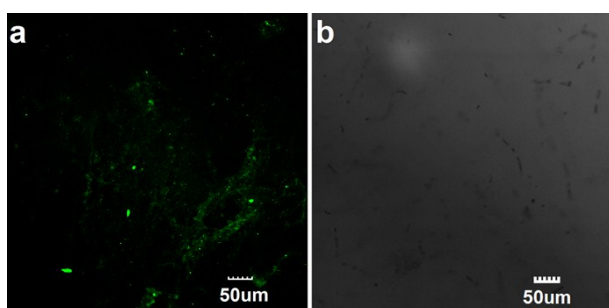

**Figure S9.** Images of mouse brain slice stained with **Mem-NO** and imaged before DEA NONOate was added. (a) TPM image of the brain slice at a depth of 100  $\mu\text{m}$ . (b) Bright-field image. The TPM image was collected at 520-580 nm upon excitation at 810 nm with fs pulses.

# NMR spectra of Compounds

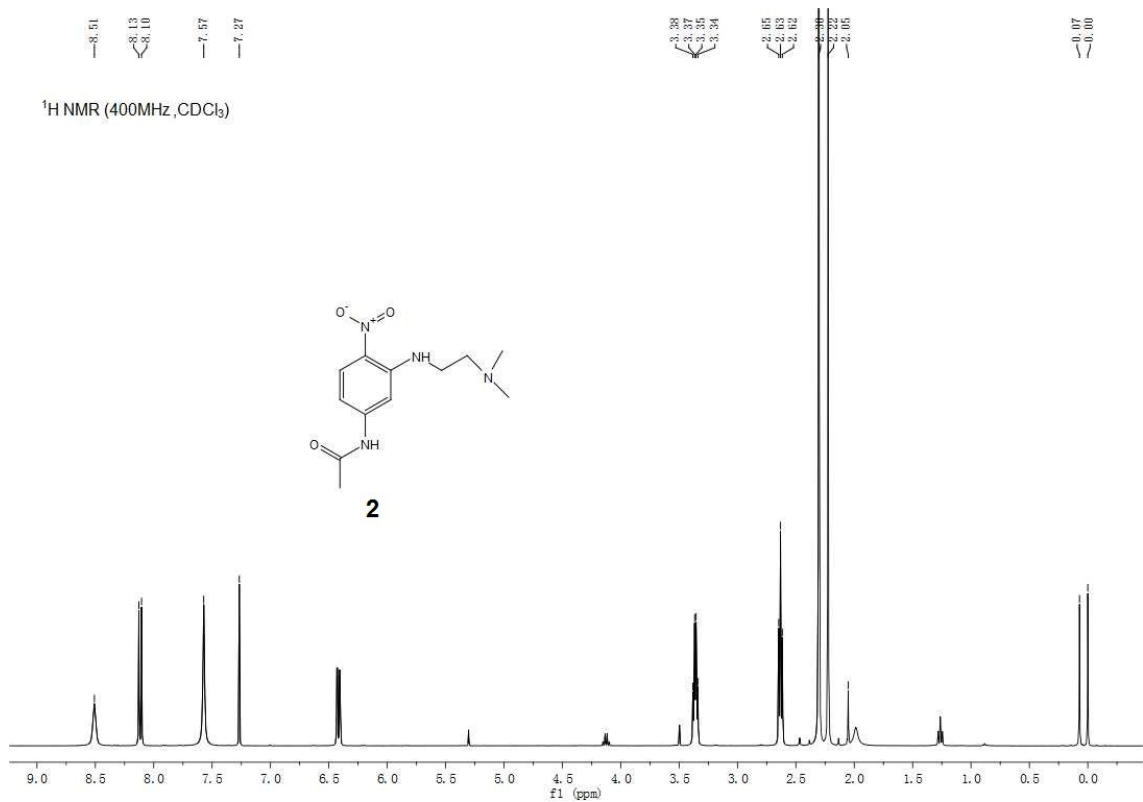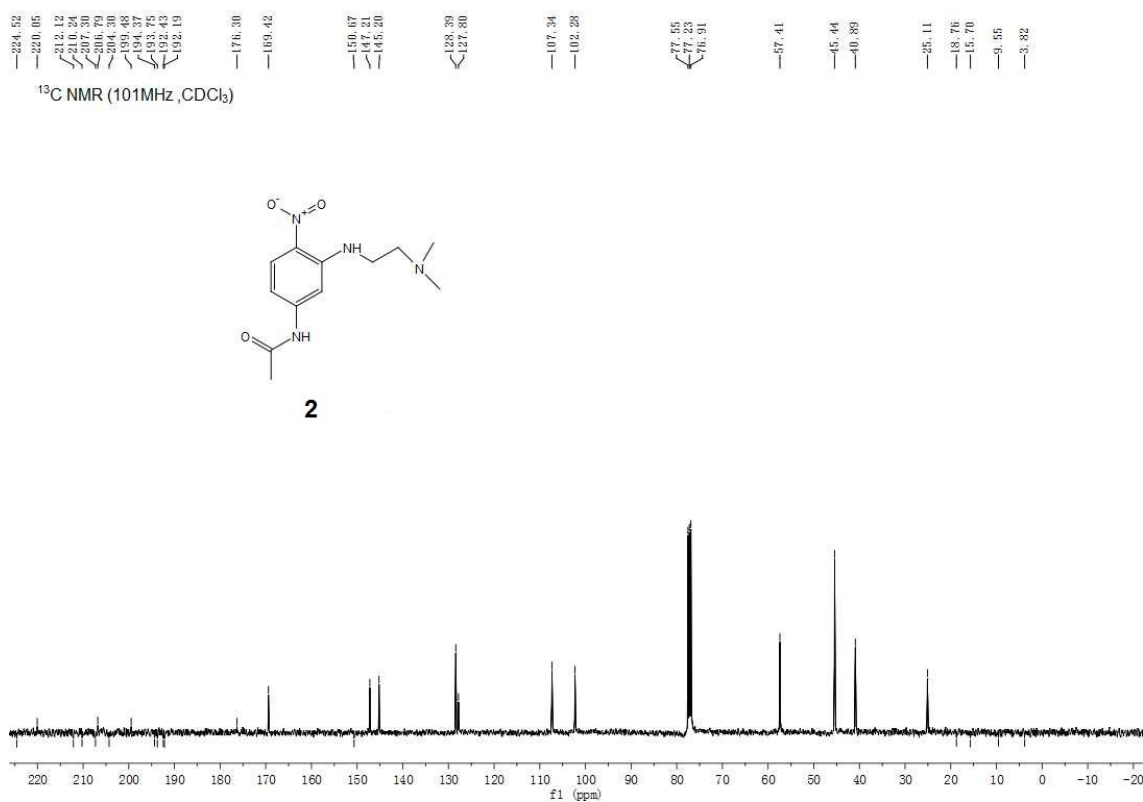

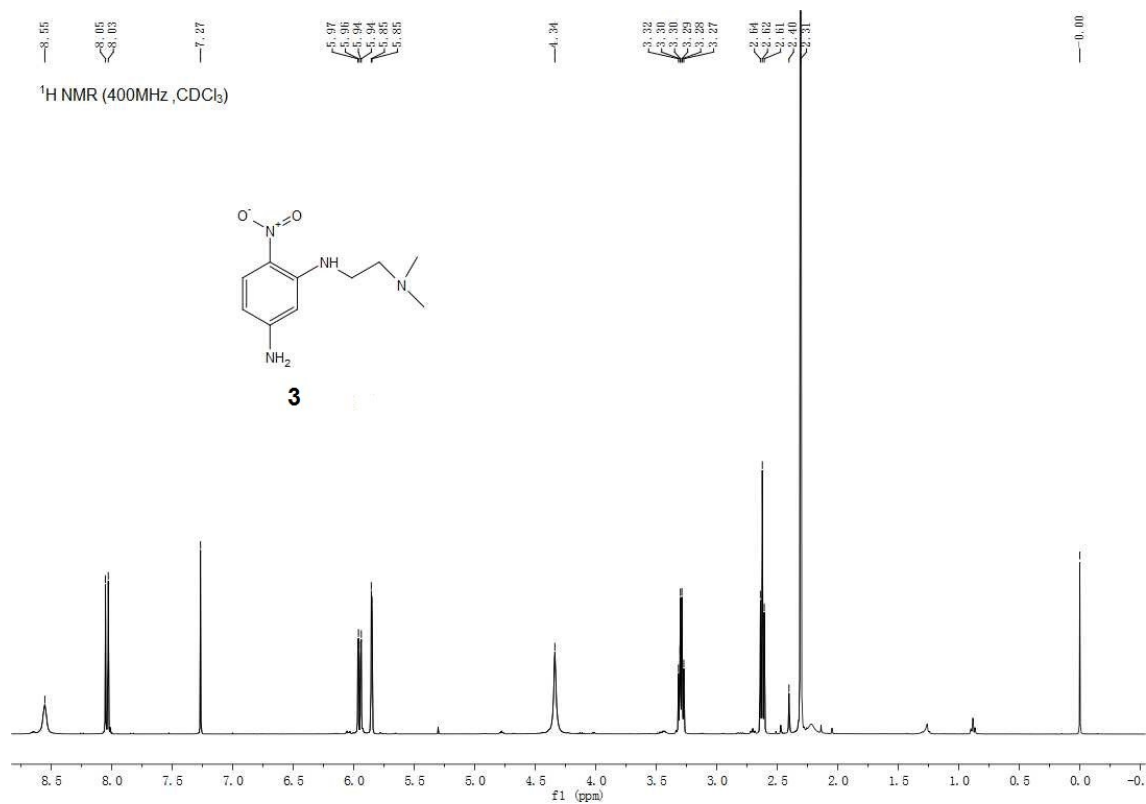

<sup>13</sup>C NMR (101MHz, CDCl<sub>3</sub>)

154.24  
148.18  
129.71  
124.60  
105.42  
93.85  
77.51  
77.20  
76.88  
57.50  
45.44  
40.82

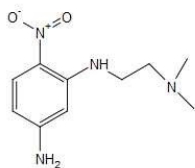

**3**

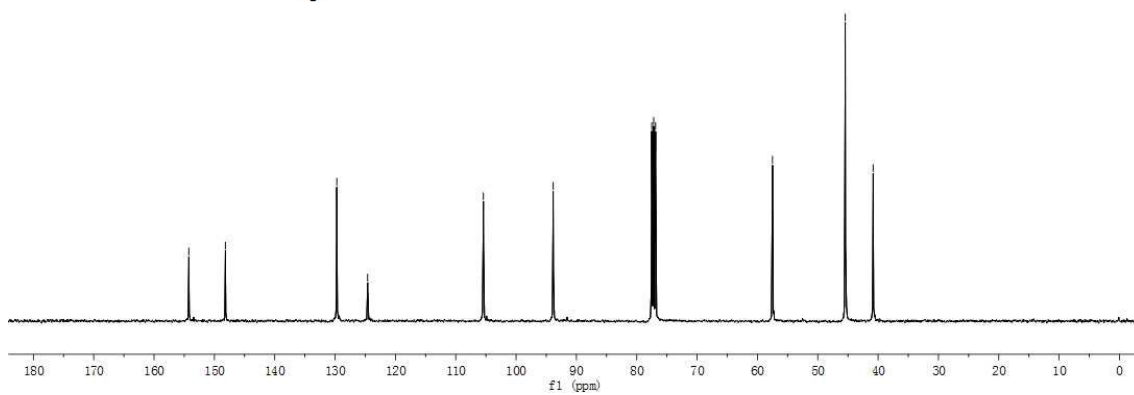

<sup>1</sup>H NMR (400MHz, DMSO-d<sub>6</sub>)

8.62  
8.61  
8.58  
8.36  
8.34  
8.33  
8.27  
8.25  
8.22  
8.20  
8.04  
8.02  
7.23  
6.76  
6.74  
5.75  
4.02  
4.02  
3.34  
2.55  
2.54  
2.50  
2.22  
1.99  
1.17

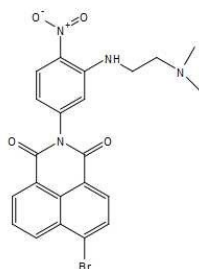

**4**

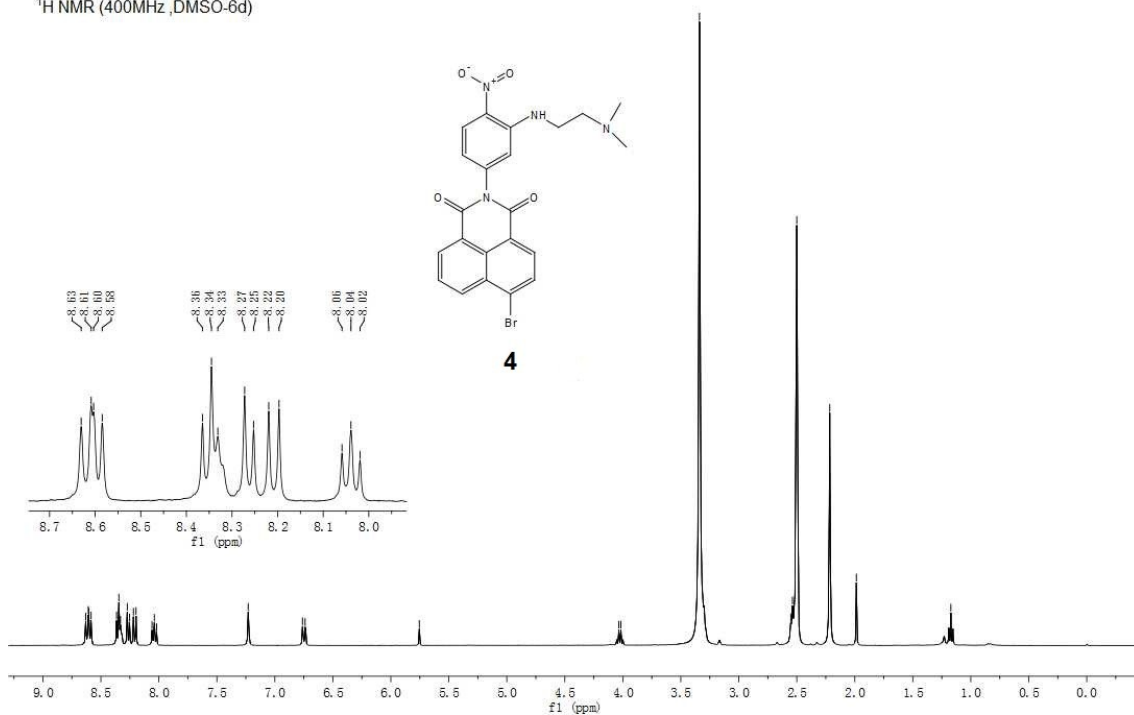



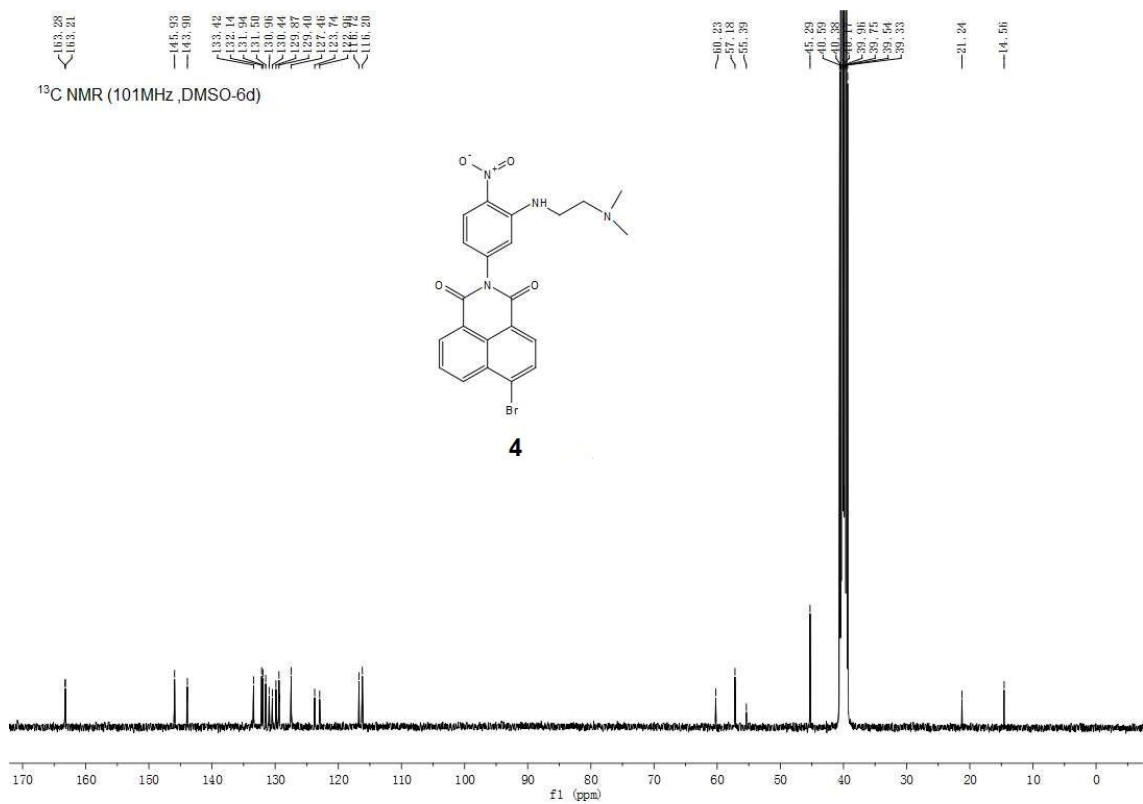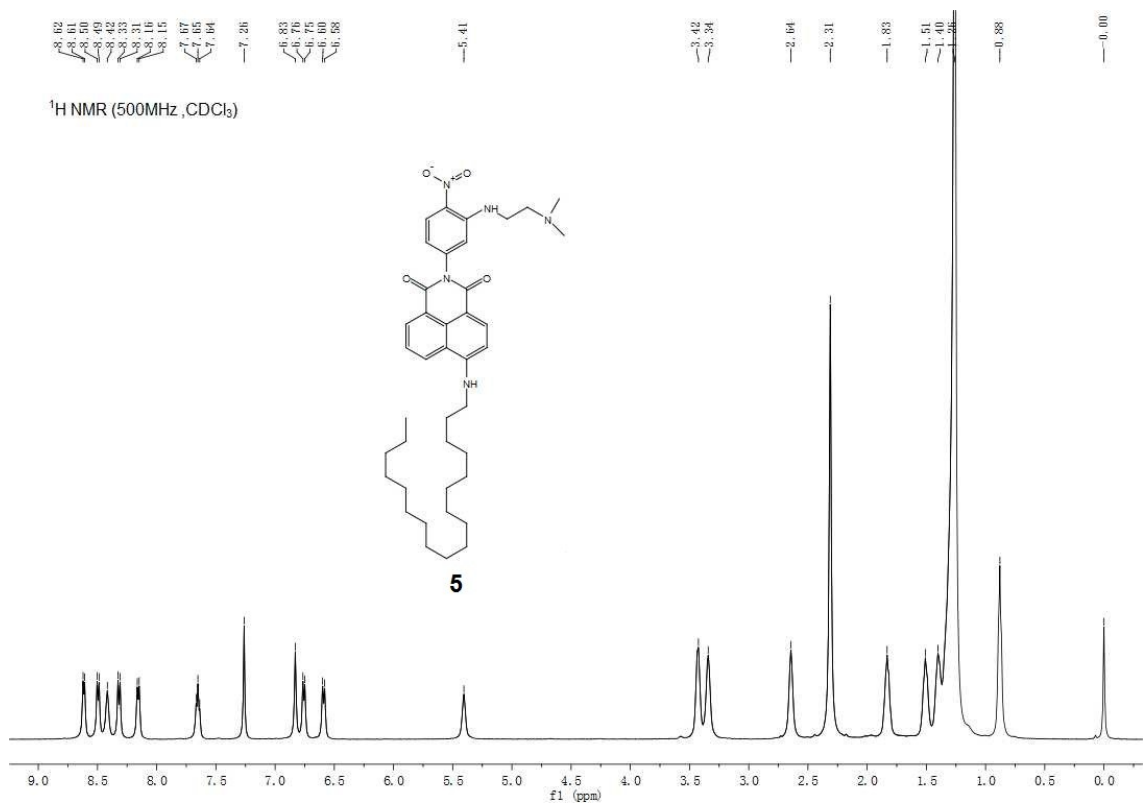

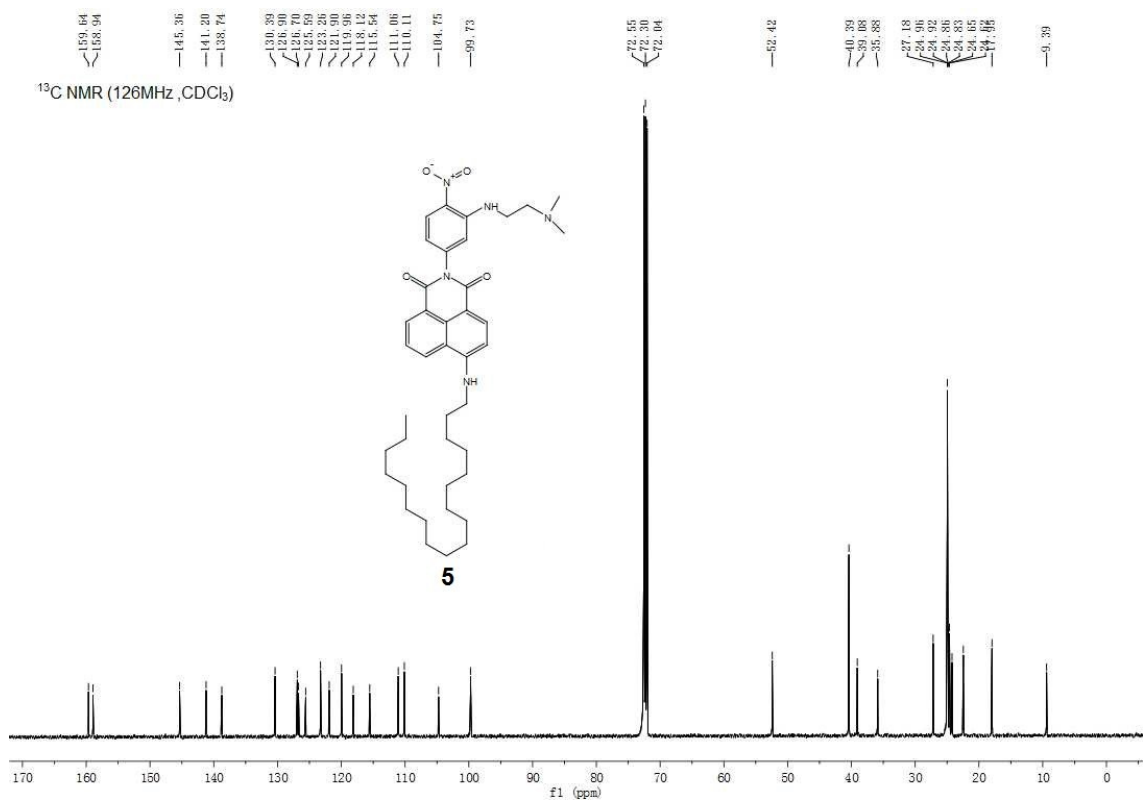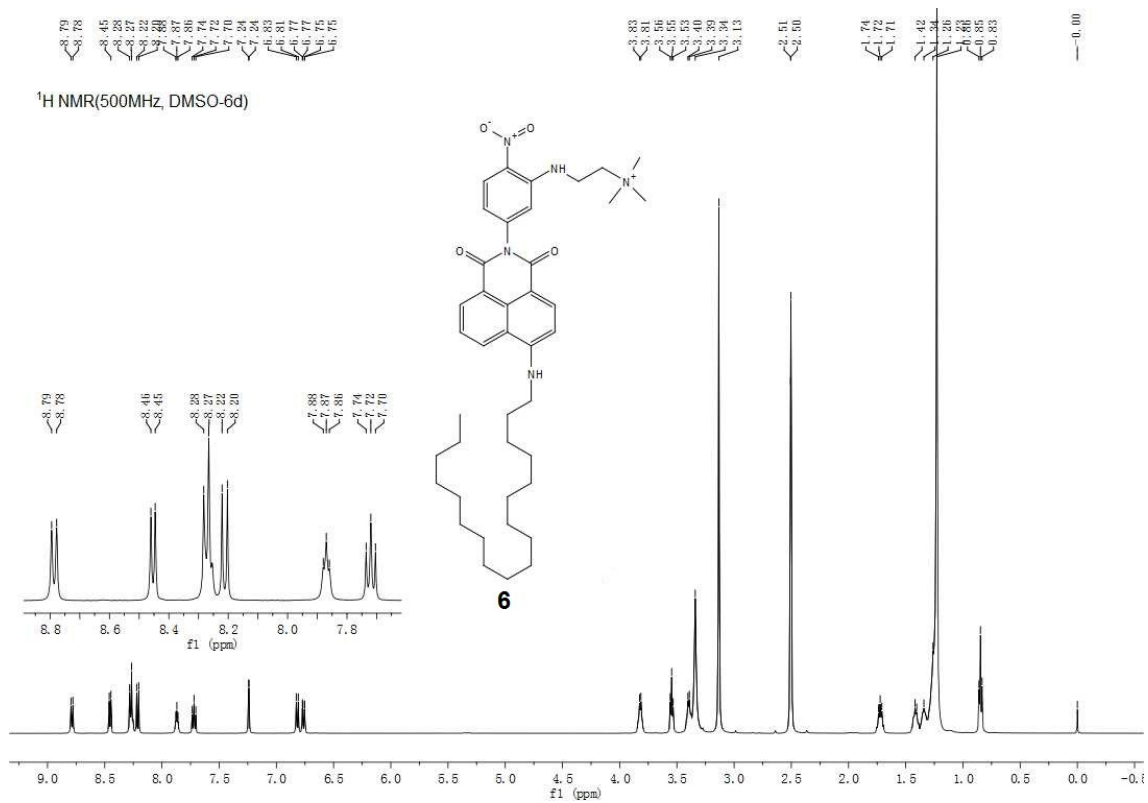

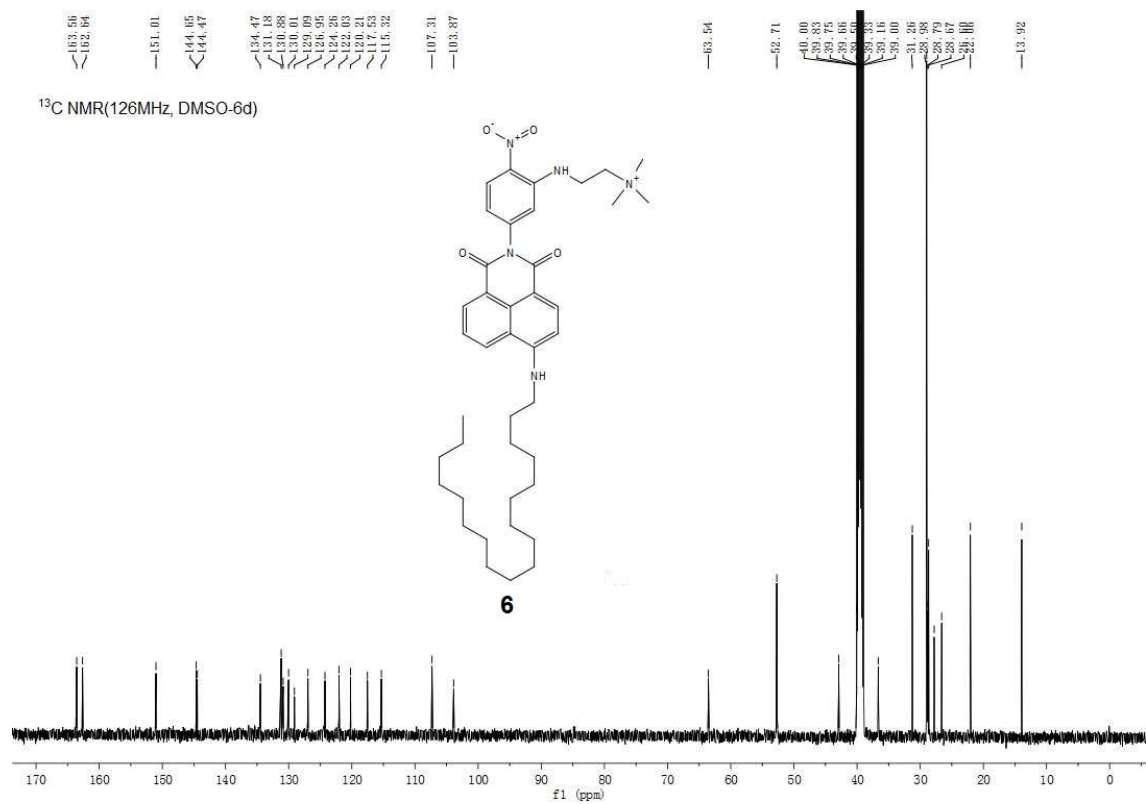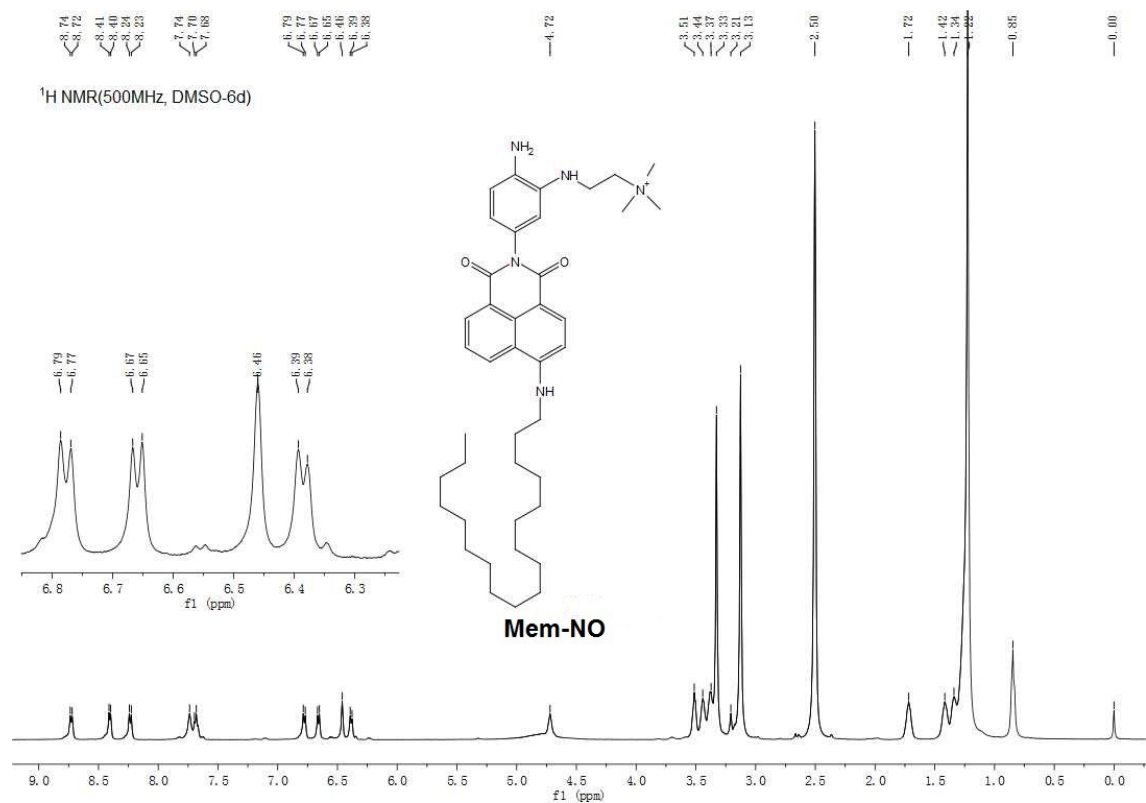

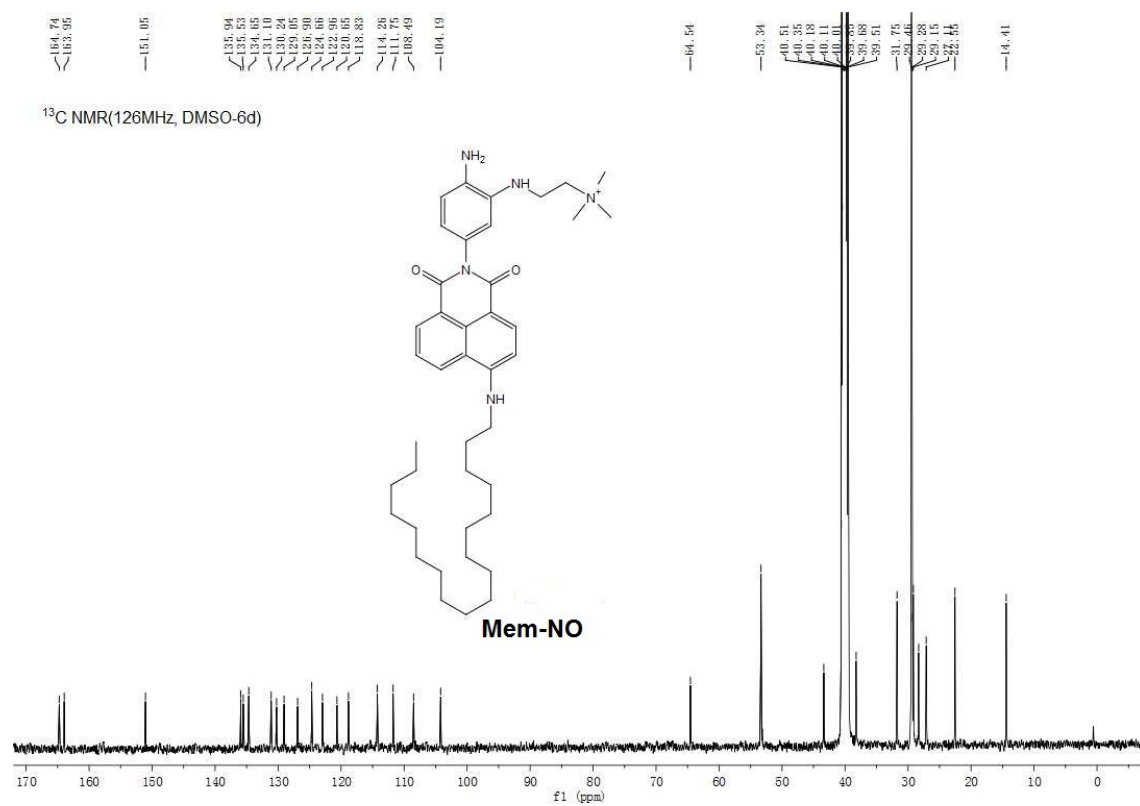

HRMS of Mem-NO

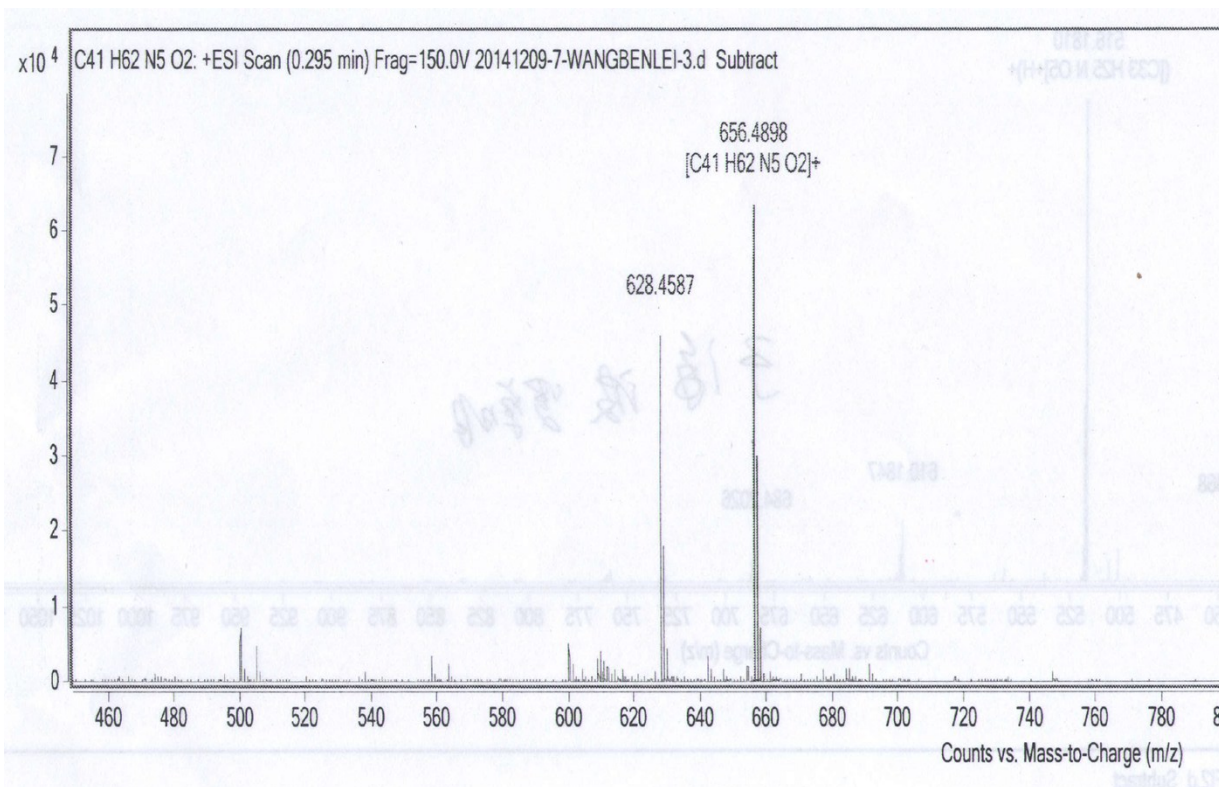

Supplement: c8an00905h1.pdf [file c8an00905h1.pdf]
